# Supplementary material for: Study Protocol – Improving Access to Kidney Transplants (IMPAKT): A detailed account of a qualitative study investigating barriers to transplant for Australian Indigenous people with end-stage kidney disease
Source: PubMed Central journal article supplement (PMC2275237; doi:10.1186/1472-6963-8-31), 2008-02-04
Supplement: 1472-6963-8-31-S2.pdf [file 1472-6963-8-31-S2.pdf]

# ARE YOU ON DIALYSIS?

***We invite you to  
tell us about your  
experiences***

## **What is IMPAKT about?**

IMPAKT is a study about improving access to kidney transplants for suitable people. Patients as well as staff will be joining the study at hospitals around Australia.

We are very keen to hear from Aboriginal and Torres Strait Islander patients because kidney disease affects more Aboriginal and Torres Strait Islanders than other people.

## **What will it mean if I take part in the study?**

Interviewers from our team will ask your opinions about treatments, about the kind of information you get and any difficulties you have. We would like to record your experiences.

This study does not involve any medical treatments. There is no payment for this.

## **What is the point of taking part in this study?**

You will help us understand the barriers to transplant so they might be moved. All suitable people will then have a better chance for a transplant.

## **When will we be here?**

Our interviewers, Jeannie Devitt and Cilla Preece, will be in the Nightcliff Renal Unit & Royal Darwin Hospital between

**9 - 20 May 2005**

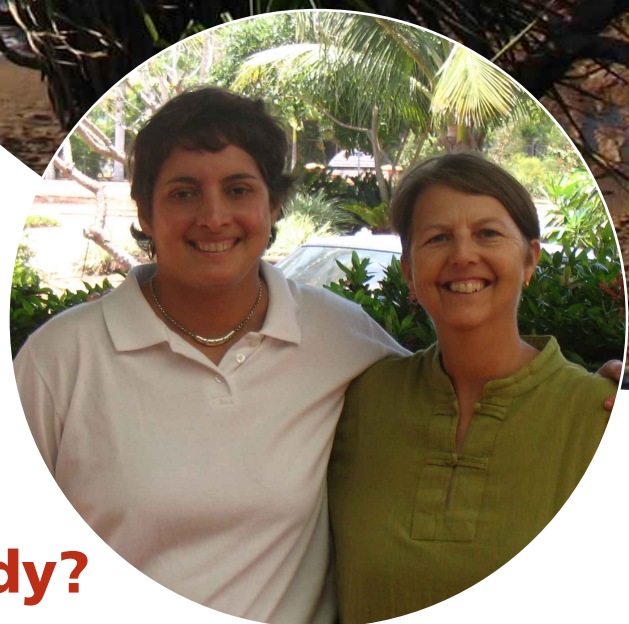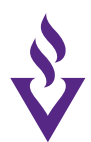

THE GEORGE INSTITUTE  
*for International Health*

If you are interested to participate in this study, please ask a nurse in this renal unit for an information sheet or contact: Kate Anderson

Ph: (02) 9993 4574 or [kanderson@thegeorgeinstitute.org](mailto:kanderson@thegeorgeinstitute.org)



# ARE YOU ON DIALYSIS?

***We invite you to  
tell us about your  
experiences***

## **What is IMPAKT about?**

IMPAKT is a study about improving access to kidney transplants for suitable people. Patients as well as staff will be joining the study at hospitals around Australia.

We are very keen to hear from Aboriginal and Torres Strait Islander patients because kidney disease affects more Aboriginal and Torres Strait Islanders than other people.

## **What will it mean if I take part in the study?**

Interviewers from our team will ask your opinions about treatments, about the kind of information you get and any difficulties you have. We would like to record your experiences.

This study does not involve any medical treatments. There is no payment for this.

## **What is the point of taking part in this study?**

You will help us understand the barriers to transplant so they might be moved. All suitable people will then have a better chance for a transplant.

## **When will we be here?**

Our interviewers, Jeannie Devitt and Cilla Preece, will be in Cairns Base Hospital & Calvary Hospital Renal Units between

**22 February - 11 March 2005**

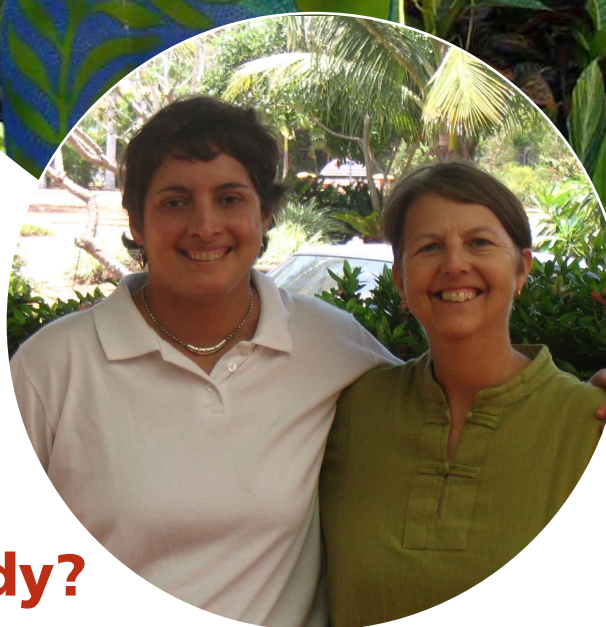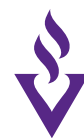

THE GEORGE INSTITUTE  
for International Health

If you are interested to participate in this study, please ask a nurse in this renal unit for an information sheet or contact: Kate Anderson

Ph: (02) 9993 4574 or [kanderson@thegeorgeinstitute.org](mailto:kanderson@thegeorgeinstitute.org)
