# Supplementary material for: Study Protocol – Improving Access to Kidney Transplants (IMPAKT): A detailed account of a qualitative study investigating barriers to transplant for Australian Indigenous people with end-stage kidney disease
Source: PubMed Central journal article supplement (PMC2275237; doi:10.1186/1472-6963-8-31), 2008-02-04
Supplement: 1472-6963-8-31-S7.pdf [file 1472-6963-8-31-S7.pdf]

# STAFF INTERVIEW

## IMPQ3

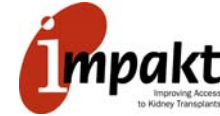

### **Points to make:**

- interested in all patients and interested in Aboriginal/Torres Strait Islander patients

### **Introductory Comment**

Recalling what the IMPAKT study is about, is there anything in particular you'd like to say before we go through these questions?

### **Information and Communication**

- 1) Could you describe your role in educating patients about their treatment options?
  - 2) In your view does the service currently provide effective education to its renal patients?
  - 3) In your view does the service currently provide appropriate information to its renal patients?
  - 4) What materials or other resources are available in this unit/hospital to support you in providing patient education?
  - 5) How do you determine whether or not a patient is understanding your communication with them?
  - 6) What options do you have if you are concerned that the patient is not understanding?
  - 7) Have you ever worked with an interpreter with a patient?
  - 8) In your view, are all patients here well informed about their illness and treatment options?
  - 9) Do patients ask questions about their situation/treatments? Examples?
  - 10) What – if any - do you think are the current barriers to patients being well-informed about their illness and treatment options? Given the authority, what would you change?
  - 11) How – if at all – does ethnicity or cultural difference influence the way you manage patients
- a) *Could you describe the key issues that Aboriginal and Torres Strait Islander patients seek your assistance with.*

### **Treatments**

- 12) In your experience have you noticed patterns of choice for one treatment over another among particular groups of patients (age, gender, ethnicity)
- 13) What is your personal view on the relative merits of available treatment options? What about for Aboriginal/Torres Strait Islander people? (PD, HD, Tx,)

- 14) In your experience do patients have difficulties with costs associated with any aspects of these treatments? (consider medications/transport/accommodation)
  - 15) How – if at all - do you think treatment location (home/satellite/hospital) affects patients' access to Tx
  - 16) In your experience here, what are the most common psycho-social effects of dialysis treatments?
- b) *In your experience what sort of issues do Aboriginal/Torres Strait Islander people find most difficult about their treatments?*
  - c) *Are you aware of any particular cultural issues that come up for patients needing these treatments?*

## **Transplant**

- 17) Could you describe your role –if any - in preparing a patient to get on Tx list?
  - 18) Are you aware if individual patients are on the Tx waiting list?
  - 19) Do patients ask you about Tx? Are some patients more likely than others to ask?
  - 20) What kinds of reasons do people give you for either being keen on or against the idea of Tx? Aboriginal/TI people?
  - 21) Do you actively promote Tx to the patients in your care?
  - 22) In general, do you think this site/unit actively promotes Tx as a treatment option?
  - 23) Do you raise the issue of LRD with patients? With Aboriginal/TI patients?
  - 24) What –if any - do you think are the particular barriers to patients from this unit/site getting a Tx? To Aboriginal/TI patients? Given the chance, what would you change?
- d) *Do you have a role in discussions about individual patient suitability for Tx?*
  - e) *Are you personally comfortable discussing (non-clinical) aspects of transplantation with patients and families?*
  - f) *Are there any particular issues that might make it difficult or even impossible for you to provide information on transplantation to Aboriginal or Torres Strait Islander patients and their families?*
  - g) *Do you prefer to be involved or not involved in that decision-making? Why is that?*
  - h) *Have any Aboriginal or Torres Strait Islander patients raised the issue of a LRD with you?*
  - i) *What sort of understanding do you think there is in your own community about transplantation (what means, how get kidney etc).*

## **Compliance**

- 25) Would you say that compliance with treatments is an issue for any particular groups of patients here (ethnicity, age, gender) ?
- 26) **\*\*How do you manage/respond to a patient that is regularly non-compliant e.g missing dialysis treatments?**

- 27) In your experience here, what sort of circumstances lead to patients being non-compliant? What about Aboriginal/TI patients?
  - 28) How – if at all - is a patient's pattern of compliance/non-compliance documented?
  - 29) Is there an agreed review process for patients who have difficulty with compliance?
  - 30) As far as you are aware, how does compliance impact on Tx potential?
- 
- j) *\*\*Would you usually participate in managing Aboriginal/Torres Strait Islander patients who regularly misses dialysis treatments, medications or appointments?*
  - k) *What sort of strategies do you try (or recommend)?*

**System & context**

- 31) Does this dept/institution/unit have policies on social/cultural diversity?
- 32) Does it have policies addressing equity issues?
- 33) Does it have policies on interpreter use?
- 34) Would you say these policies are reflected in service delivery?
- 35) Do you think this unit/department deals fairly with clients? With Aboriginal/Torres Strait Islander clients ?
- 36) Do you think this unit/department deals fairly with staff? With Aboriginal/Torres Strait Islander staff?
- 37) What has been your main source of information in dealing with Aboriginal/Torres Strait Islander clients ?
