# Supplementary material for: Study Protocol – Improving Access to Kidney Transplants (IMPAKT): A detailed account of a qualitative study investigating barriers to transplant for Australian Indigenous people with end-stage kidney disease
Source: PubMed Central journal article supplement (PMC2275237; doi:10.1186/1472-6963-8-31), 2008-02-04
Supplement: 1472-6963-8-31-S15.pdf [file 1472-6963-8-31-S15.pdf]

# **Kimberley Satellite Dialysis Centre**

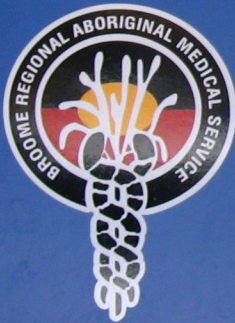

**BROOME REGIONAL  
ABORIGINAL  
MEDICAL SERVICE**
