# Supplementary material for: Study Protocol – Improving Access to Kidney Transplants (IMPAKT): A detailed account of a qualitative study investigating barriers to transplant for Australian Indigenous people with end-stage kidney disease
Source: PubMed Central journal article supplement (PMC2275237; doi:10.1186/1472-6963-8-31), 2008-02-04
Supplement: 1472-6963-8-31-S20.pdf [file 1472-6963-8-31-S20.pdf]

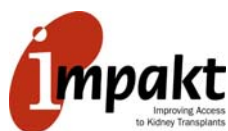

**RECORD OF INTERVIEW**

ID Number.....

| DATE   | SITE | CATEGORY             | I/ER   |
|--------|------|----------------------|--------|
| / / 05 |      | Patient/family/other | CP/ JD |

**Satisfaction**

38) Do you think the medical treatment and care here is.....

|               |             |           |                      |
|---------------|-------------|-----------|----------------------|
| <b>v.good</b> | <b>good</b> | <b>OK</b> | <b>not very good</b> |
|---------------|-------------|-----------|----------------------|

39) Do you think your specialist is doing a good job for you? Would you say its...

|               |             |           |                      |
|---------------|-------------|-----------|----------------------|
| <b>v.good</b> | <b>good</b> | <b>OK</b> | <b>not very good</b> |
|---------------|-------------|-----------|----------------------|

**Socio-demographic data**

| Age                                   | 20-29                                | 30-39  | 40-49 | 50-59      | 60-69 | 70+ |
|---------------------------------------|--------------------------------------|--------|-------|------------|-------|-----|
| Gender                                |                                      |        |       |            |       |     |
| Ethnic affiliations/heritage          |                                      |        |       |            |       |     |
| Where living before starting dialysis |                                      |        |       |            |       |     |
| place living now                      | own home                             | rented |       | hostel     |       |     |
| Married                               |                                      |        |       |            |       |     |
| No Dependents                         | children/other                       |        |       |            |       |     |
| Main Carer                            |                                      |        |       |            |       |     |
| Other services used                   | e.g. paid carer, meals on wheels etc |        |       |            |       |     |
| First language                        |                                      |        |       |            |       |     |
| Other languages                       |                                      |        |       |            |       |     |
| Employed now?                         |                                      |        |       |            |       |     |
| Employed before dialysis?             |                                      |        |       |            |       |     |
| Education/years of school?            |                                      |        |       |            |       |     |
| Religious affiliation                 |                                      |        |       |            |       |     |
| Own a car?                            |                                      |        |       |            |       |     |
| Own a phone?                          |                                      |        |       |            |       |     |
| Own a home computer?                  |                                      |        |       |            |       |     |
| Use the internet?                     |                                      |        |       |            |       |     |
| Read English?                         | v.well                               | well   | OK    | not v.well | no    |     |

## Card sort

|                                                                                                                       |    |   |  |
|-----------------------------------------------------------------------------------------------------------------------|----|---|--|
| A person must have lots medical tests before they get a new kidney.                                                   | NT | T |  |
| A person waiting for a new kidney must stay fit and healthy.                                                          | NT | T |  |
| Sometimes a new kidney stops working.<br>That person must go back to dialysis.                                        | NT | T |  |
| After a person gets a new kidney they must stay in hospital for a long time - up to 1 month.                          | NT | T |  |
| The operation for a new kidney happens in a big city hospital in .....Brisbane/Perth/Adelaide/Sydney.                 | NT | T |  |
| Later on, after the new kidney settles down and everything is working well, a person with a new kidney might go home. | NT | T |  |
| When a person has the operation to get a new kidney sometimes things go wrong.                                        | NT | T |  |
|                                                                                                                       |    |   |  |
| My kidneys can get better.                                                                                            | NT | T |  |
| A person with a new kidney can stop taking medicines.                                                                 | NT | T |  |
| When a person gets a new kidney there will be no more blood tests and no more kidney doctor visits.                   | NT | T |  |
| Missing dialysis sessions helps a person to get a new kidney.                                                         | NT | T |  |
| When a person gets called for a new kidney all their family can go with them.                                         | NT | T |  |
|                                                                                                                       |    |   |  |
|                                                                                                                       |    |   |  |
|                                                                                                                       |    |   |  |

## Notes
