# Supplementary material for: Study Protocol – Improving Access to Kidney Transplants (IMPAKT): A detailed account of a qualitative study investigating barriers to transplant for Australian Indigenous people with end-stage kidney disease
Source: PubMed Central journal article supplement (PMC2275237; doi:10.1186/1472-6963-8-31), 2008-02-04
Supplement: 1472-6963-8-31-S21.pdf [file 1472-6963-8-31-S21.pdf]

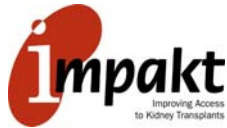

**RECORD OF INTERVIEW**

ID Number.....

| DATE   | SITE | CATEGORY   | I/ER       |
|--------|------|------------|------------|
| / / 05 |      | RS /SS /NE | CP/ JD/ AC |

**Job Title**.....

**Locations currently working at:**.....

**Organisational culture/values**

Could you describe the extent that your work place emphasizes:

|                                 | 1 | 2 | 3 | 4 | 5 | can't say |
|---------------------------------|---|---|---|---|---|-----------|
| efficiency                      |   |   |   |   |   |           |
| economy                         |   |   |   |   |   |           |
| patient-centred care            |   |   |   |   |   |           |
| shared decision-making          |   |   |   |   |   |           |
| clinical excellence             |   |   |   |   |   |           |
| staff development               |   |   |   |   |   |           |
| patient development/empowerment |   |   |   |   |   |           |

**(1 = 'Not at all'**

**5 = 'very strongly')**

In your judgement, is the standard of medical care here.....

|               |             |                 |                           |
|---------------|-------------|-----------------|---------------------------|
| <b>v.good</b> | <b>good</b> | <b>adequate</b> | <b>less than adequate</b> |
|---------------|-------------|-----------------|---------------------------|

**Social-demographic**

|                                    | 20-29 | 30-39 | 40-49 | 50-59 | 60-69 | 70+ |
|------------------------------------|-------|-------|-------|-------|-------|-----|
| Age                                |       |       |       |       |       |     |
| Gender                             |       |       |       |       |       |     |
| Ethnic Affiliations                |       |       |       |       |       |     |
| First language                     |       |       |       |       |       |     |
| Other languages                    |       |       |       |       |       |     |
| Time in current position           |       |       |       |       |       |     |
| Time at site                       |       |       |       |       |       |     |
| Renal training                     |       |       |       |       |       |     |
| Cross cultural training            |       |       |       |       |       |     |
| Training to work with interpreters |       |       |       |       |       |     |

**Notes**
