# Supplementary material for: Study Protocol – Improving Access to Kidney Transplants (IMPAKT): A detailed account of a qualitative study investigating barriers to transplant for Australian Indigenous people with end-stage kidney disease
Source: PubMed Central journal article supplement (PMC2275237; doi:10.1186/1472-6963-8-31), 2008-02-04
Supplement: 1472-6963-8-31-S22.pdf [file 1472-6963-8-31-S22.pdf]

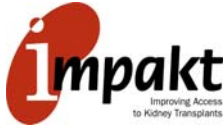

**RECORD OF INTERVIEW**

ID Number.....

| DATE  | SITE | CATEGORY  | I/ER   |
|-------|------|-----------|--------|
| / /05 |      | EDUCATION | CP/ JD |

**Job Title**.....

**Locations currently working at:**.....

**Subjective Evaluative Comments** ([to follow questions 1-6](#))

In your experience which of the following best describe the kinds of educational activities currently undertaken at this site. Circle as many of these terms as you wish.

one-to-one  
face-to-face  
patient groups  
involves family

conversation-style  
lecture-style

friendly  
authoritarian  
empowering  
effective  
appropriate  
waste of time  
enjoyed by patients  
enjoyed by educator/staff  
difficult  
interesting

highly interactive  
passive learners  
active learners  
group learning  
shared learning  
‘two-way’

well-planned  
opportunistic  
targetted  
personalised  
ad hoc  
on-the-run  
uncoordinated  
highly variable quality  
consistent quality

multi-disciplinary  
outsourced  
incorporates support resources

Add any other words you think describe these activities:

.....  
.....  
.....

.....  
.....  
.....

**Organisational culture/values**

Could you describe the extent that your work place emphasizes:

|                                 | <b>1</b> | <b>2</b> | <b>3</b> | <b>4</b> | <b>5</b> | <b>can't say</b> |
|---------------------------------|----------|----------|----------|----------|----------|------------------|
| efficiency                      |          |          |          |          |          |                  |
| economy                         |          |          |          |          |          |                  |
| patient-centred care            |          |          |          |          |          |                  |
| shared decision-making          |          |          |          |          |          |                  |
| clinical excellence             |          |          |          |          |          |                  |
| staff development               |          |          |          |          |          |                  |
| patient development/empowerment |          |          |          |          |          |                  |

**(1 = 'Not at all'**

**5 = 'very strongly')**

In your judgement, is the standard of medical care here.....

|               |             |                 |                           |
|---------------|-------------|-----------------|---------------------------|
| <b>v.good</b> | <b>good</b> | <b>adequate</b> | <b>less than adequate</b> |
|---------------|-------------|-----------------|---------------------------|

**Social-demographic**

| Age                                | <b>20-29</b> | <b>30-39</b> | <b>40-49</b> | <b>50-59</b> | <b>60-69</b> | <b>70+</b> |
|------------------------------------|--------------|--------------|--------------|--------------|--------------|------------|
|                                    |              |              |              |              |              |            |
| Gender                             |              |              |              |              |              |            |
| Ethnic Affiliations                |              |              |              |              |              |            |
| First language                     |              |              |              |              |              |            |
| Other languages                    |              |              |              |              |              |            |
| Time in current position           |              |              |              |              |              |            |
| Time at site                       |              |              |              |              |              |            |
| Renal training                     |              |              |              |              |              |            |
| Cross cultural training            |              |              |              |              |              |            |
| Training to work with interpreters |              |              |              |              |              |            |

**Notes**
