# Supplementary material for: Study Protocol – Improving Access to Kidney Transplants (IMPAKT): A detailed account of a qualitative study investigating barriers to transplant for Australian Indigenous people with end-stage kidney disease
Source: PubMed Central journal article supplement (PMC2275237; doi:10.1186/1472-6963-8-31), 2008-02-04

17/10/05

# RENAL UNIT PROCESS MAP: IMPAKT

Patient? What offered at R.P.H. Sent from Kalg. as acute pt.

Ex. *Ex. lady*

Patient Arrives in Kalg. from RPH & Hickman - no fistula

? Candidate for P.D. & transplant

Attends unit 3x week awaiting formation of fistula in 6 weeks approx.

Lives in own home. & Partner & 2 children.

Return to Perth for fistula formation organized by Vascular Access Staff (P.A.T.S. aid)

Needing transport, accommodation Problems & loneliness & no money.

Back to KRH unit still using Hickman for 6 weeks

Back to Perth for 1st needling - usually 3x sessions As an outpatient - in hostel or similar

T'PORT & ACCOMMISSING Family

Return KRH if successful - Hickman out in KRH after 2 weeks (approx.) - if Dr. available

**MAJOR ISSUES** - Impacting on Health.  
\* literacy  
\* telling the time -  
\* finances, can no spare cash  
\* isolation ~~when~~ when in Perth  
\* STRESSED - BENS in Perth always from family / friends  
\* language barriers.

**Tx interest by patient**

No

Yes

NO

donor e pt. tests - bloods Psych Medical in Perth

living donor?

Yes

Back to Perth for appt.

Educational Material - appt & Tx team in Perth

Advise Tx co-ord & Nephrologist

Perth.

? cardiovascular

yes

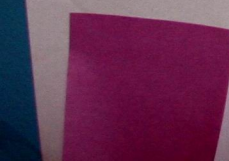

Supplement: 1472-6963-8-31-S24.pdf [file 1472-6963-8-31-S24.pdf]
