# Supplementary material for: Study Protocol – Improving Access to Kidney Transplants (IMPAKT): A detailed account of a qualitative study investigating barriers to transplant for Australian Indigenous people with end-stage kidney disease
Source: PubMed Central journal article supplement (PMC2275237; doi:10.1186/1472-6963-8-31), 2008-02-04

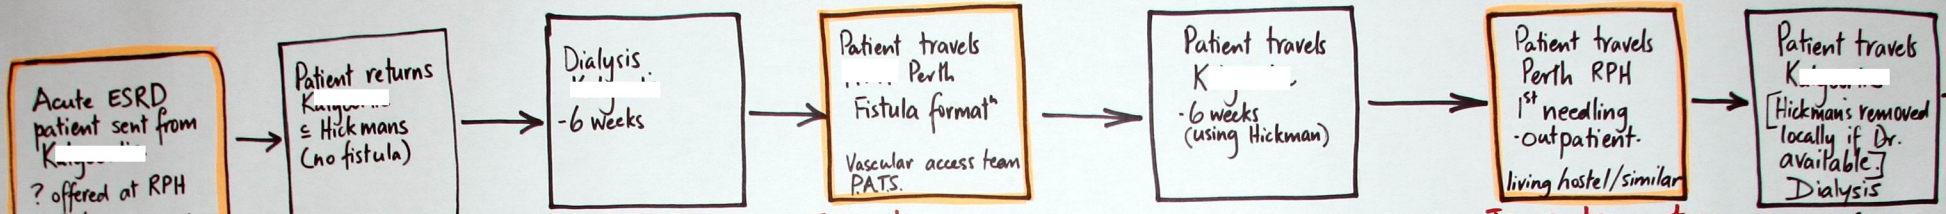

Issues: transport + accom  
-loneliness  
-no money

Issues - transport, accom  
-missing family

MAJOR ISSUES IMPACTING ON HEALTH

- \* literacy
- \* telling the time
- \* finance, no spare cash
- \* isolation when in Perth
- \* stressful being in Perth away from family/friends
- \* language barriers

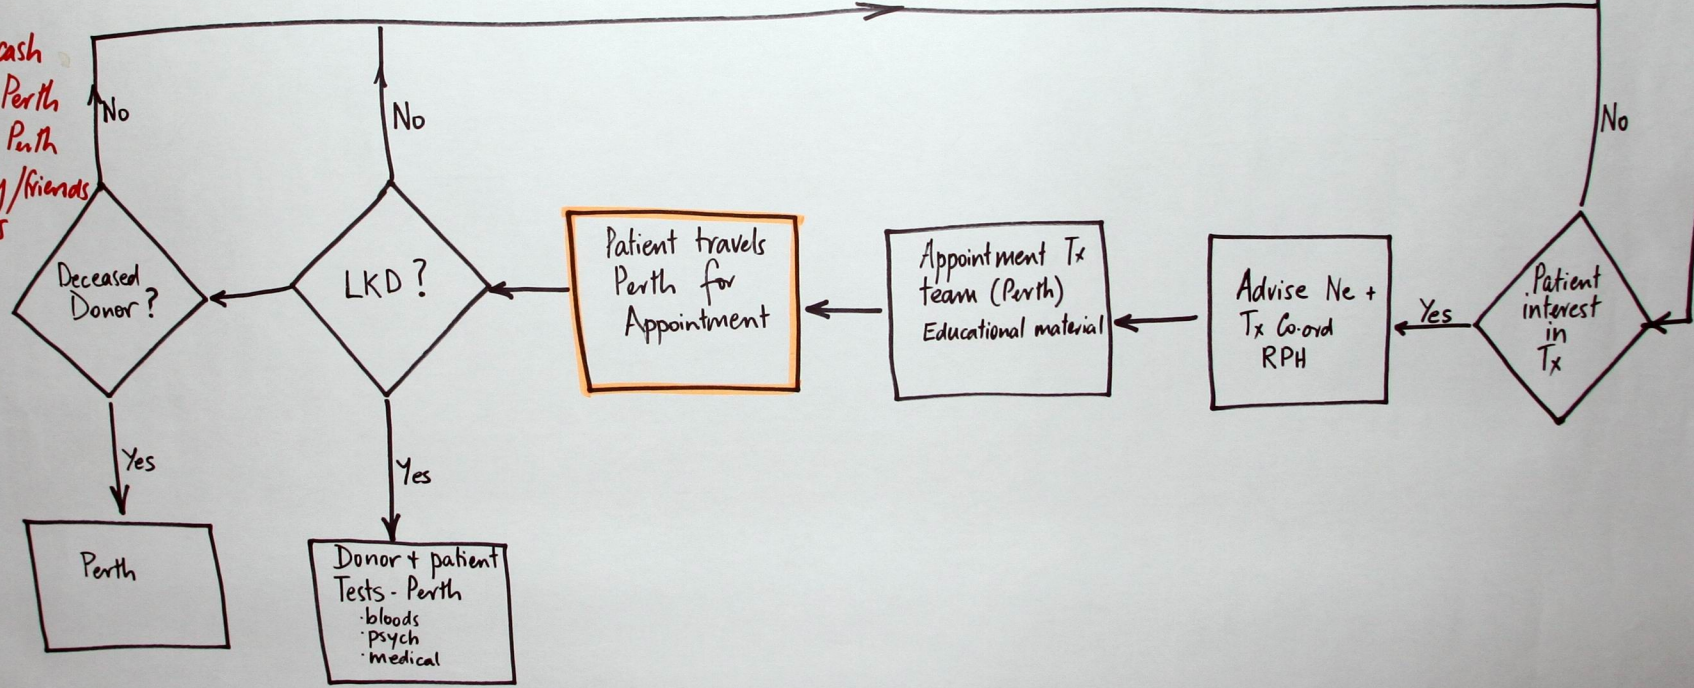

Supplement: 1472-6963-8-31-S25.pdf [file 1472-6963-8-31-S25.pdf]
