# Supplementary material for: Study Protocol – Improving Access to Kidney Transplants (IMPAKT): A detailed account of a qualitative study investigating barriers to transplant for Australian Indigenous people with end-stage kidney disease
Source: PubMed Central journal article supplement (PMC2275237; doi:10.1186/1472-6963-8-31), 2008-02-04
Supplement: 1472-6963-8-31-S26.pdf [file 1472-6963-8-31-S26.pdf]

**Information and Communication**

- 1) Could you describe your role in educating patients about their treatment options?
- 2) What do you find most difficult in relation to patient education?
- 3) What do you think patients currently find most difficult in learning about the illness and options?
- 4) In your view does the service currently provide effective education to its renal patients?
- 5) In your view does the service currently provide appropriate information to its renal patients?
- 6) What materials or other resources are available in this unit/hospital to support you in providing patient education?
- 7) How do you determine whether or not a patient is understanding your communication with them?
- 8) What options do you have if you are concerned that the patient is not understanding.
- 9) Have you ever worked with an interpreter with a patient?
- 10) In your view, are all patients here well informed about their illness and treatment options?
- 11) Do patients ask questions about their situation/treatments? Examples?
- 12) How –if at all – do you think education and information processes at this site might constitute a barrier to Aboriginal/Torres Strait Islander patients accessing Tx? Given a chance, what would you change?
- 13) How – if at all – does ethnicity or cultural difference influence the way you manage patients

**PART A: LEARNER ASSESSMENT**

|                                                                                         |            |                      |                            |
|-----------------------------------------------------------------------------------------|------------|----------------------|----------------------------|
| 1) Is there a standard process of assessing patient learning capabilities?              |            |                      | <b>Y/N</b>                 |
| 2) Are patients' language/s recorded on file?                                           | <b>YES</b> | <b>all languages</b> | <b>first language only</b> |
|                                                                                         | <b>NO</b>  |                      |                            |
| 3) Is there a documented assessment of spoken English capability?                       | <b>YES</b> | <b>method:</b>       |                            |
|                                                                                         | <b>NO</b>  |                      |                            |
| 4) Is there a documented assessment of literacy/numeracy level                          | <b>YES</b> | <b>method:</b>       |                            |
|                                                                                         | <b>NO</b>  |                      |                            |
| 5) Are patient learning style preferences recorded (e.g. prefers action, face/face etc) | <b>YES</b> | <b>method:</b>       |                            |
|                                                                                         | <b>NO</b>  |                      |                            |

**Part B: PROGRAM STRUCTURE**

- 6) Who has overall responsibility for patient education programs at this site?
- 7) How are the contributions/roles of different professionals co-ordinated?
- 8) What are the discrete identifiable education programs on site?

|                                                   |            |
|---------------------------------------------------|------------|
| 9) Do program/s have explicit written objectives? | <b>Y/N</b> |
| 10) Do programs have quality review cycles?       | <b>Y/N</b> |

**Part C: PROGRAM PROCESSES**

**C1: Personnel**

- 11) What categories of patient educator does the site employ?

|  | <b>F/T</b> | <b>P/T</b> |
|--|------------|------------|
|  |            |            |
|  |            |            |
|  |            |            |

|                                                                            |            |
|----------------------------------------------------------------------------|------------|
| 12) Are there Aboriginal/TI employees working in the educational programs? | <b>Y/N</b> |
|----------------------------------------------------------------------------|------------|

**C2: Documentation**

|                                                            |            |
|------------------------------------------------------------|------------|
| 13) Are records kept of patient education program/s?       | <b>Y/N</b> |
| 14) Is individual patient educational progress documented? | <b>Y/N</b> |

### **C3: interpreter use**

|                                 |            |                  |                     |                    |
|---------------------------------|------------|------------------|---------------------|--------------------|
| 15) Are interpreters used here? | <b>YES</b> | <b>regularly</b> | <b>occasionally</b> | <b>hardly ever</b> |
|                                 | <b>NO</b>  |                  |                     |                    |

|                                   |                       |              |                       |                     |
|-----------------------------------|-----------------------|--------------|-----------------------|---------------------|
| 16) Who is employed to interpret? |                       |              |                       |                     |
| <b>accredited professionals</b>   | <b>family members</b> | <b>staff</b> | <b>other patients</b> | <b>all of these</b> |

|                                                                   |            |
|-------------------------------------------------------------------|------------|
| 17) When non-accredited interpreters are employed, are they paid? | <b>Y/N</b> |
|-------------------------------------------------------------------|------------|

|                                                        |                  |                            |                    |                 |
|--------------------------------------------------------|------------------|----------------------------|--------------------|-----------------|
| 18) How accessible/available are interpreters locally? |                  |                            |                    |                 |
| <b>easily accessed</b>                                 | <b>available</b> | <b>difficult to access</b> | <b>unavailable</b> | <b>not sure</b> |

|                                                             |                       |                  |
|-------------------------------------------------------------|-----------------------|------------------|
| 19) Could you describe your most recent use of interpreter: |                       |                  |
| <b>Date:</b>                                                | <b>Qualification:</b> | <b>Language:</b> |

### **PART D: PROGRAM SETTING**

20) Is there a space dedicated specifically to educational activities?

**YES**    **Comment:**

**NO**    **Comment:**

21) If yes, is there sufficient room for group work (e.g. family members)?

**YES**    **Comment:**

**NO**    **Comment:**

22) Is the educational setting differentiated or separated from the clinical surroundings?

**YES**    **Comment:**

**NO**    **Comment:**

23) If no specific educational space is available, where does education usually take place?

24) Are there readily accessible opportunities for self-guided education (e.g. internet, books, fact sheets etc)

**YES**    **Comment:**

**NO**    **Comment:**
