# Supplementary material for: Study Protocol – Improving Access to Kidney Transplants (IMPAKT): A detailed account of a qualitative study investigating barriers to transplant for Australian Indigenous people with end-stage kidney disease
Source: PubMed Central journal article supplement (PMC2275237; doi:10.1186/1472-6963-8-31), 2008-02-04
Supplement: 1472-6963-8-31-S27.pdf [file 1472-6963-8-31-S27.pdf]

# EDUCATIONAL RESOURCES CHECKLIST      IMPQ2

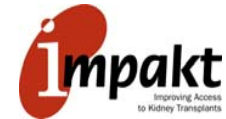

SITE .....

DATE.....

Page No.....

| TITLE | TYPE* | TOPIC* | DATE | LAN/GE | PRODUCED L/C | USE LEVEL 1-10 | COMMENT |
|-------|-------|--------|------|--------|--------------|----------------|---------|
|       |       |        |      |        |              |                |         |
|       |       |        |      |        |              |                |         |
|       |       |        |      |        |              |                |         |
|       |       |        |      |        |              |                |         |
|       |       |        |      |        |              |                |         |
|       |       |        |      |        |              |                |         |
|       |       |        |      |        |              |                |         |

\* See codes for **TYPE**, **TOPIC** over page

**Produced** either locally (L) or professional/commercial (C) (e.g. Baxter's material)

**Use Level** = on a scale of 1-10 where '1' means the resource is rarely used, and '10' is a resource that is used with almost every patient.

### **\*CODES FOR RESOURCE TYPE**

|    |                     |
|----|---------------------|
| 1  | pamphlett/factsheet |
| 2  | flipchart           |
| 3  | booklet             |
| 4  | book                |
| 5  | poster/chart        |
| 6  | postcard/photo      |
| 7  | video               |
| 8  | CD/DVD              |
| 9  | diagram/image       |
| 10 | artwork             |
| 11 | other               |
| 12 | animated sequence   |

### **\*CODES FOR TOPICS**

|     |                                              |
|-----|----------------------------------------------|
| G   | Kidney disease: general introduction         |
| AT  | All Treatment types                          |
| HD  | Haemodialysis                                |
| PD  | Peritoneal Dialysis                          |
| Tx  | Transplant                                   |
| OD  | Organ Donation                               |
| K   | Kidneys and their function                   |
| KDI | Kidney disease specific issue (e.g. anaemia) |
| O   | Other health including diabetes etc          |
