# Supplementary material for: Study Protocol – Improving Access to Kidney Transplants (IMPAKT): A detailed account of a qualitative study investigating barriers to transplant for Australian Indigenous people with end-stage kidney disease
Source: PubMed Central journal article supplement (PMC2275237; doi:10.1186/1472-6963-8-31), 2008-02-04
Supplement: 1472-6963-8-31-S28.pdf [file 1472-6963-8-31-S28.pdf]

**IMPAKT: Cards for sorting**

1. A person must have lots medical tests before they get a new kidney.
2. A person waiting for a new kidney must stay fit and healthy.
3. Sometimes a new kidney stops working.  
That person must go back to dialysis.
4. After a person gets a new kidney they must stay in hospital for a long time - up to 1 month.
5. The operation for a new kidney happens in a big city hospital in...  
*(4 different cards included 4 city names)*
6. Later on, after the new kidney settles down and everything is working well, a person with a new kidney might go home.
7. When a person has the operation to get a new kidney sometimes things go wrong.
8. My kidneys can get better.
9. A person with a new kidney can stop taking medicines.
10. When a person gets a new kidney there will be no more blood tests and no more kidney doctor visits.
11. Missing dialysis sessions helps a person to get a new kidney.
12. When a person gets called for a new kidney all their family can go with them.
